# Supplementary material
Source: PubMed Central journal article supplement (PMC10731942)
Supplement: i2331-348X-28-6-504_s01.pdf [file i2331-348X-28-6-504_s01.pdf]

**Supplemental Figure.** Heatmap of cell types present derived by using deconvolution of bulk RNA-sequencing data. *CLP*, common lymphoid progenitor; *CMP*, common myeloid progenitor; *DC*, dendritic cells; *MSC*, mesenchymal stem cell; *NK* cells, natural killer cells; *PPI*, proton pump inhibitor; *Tgd*, gamma delta T cells.

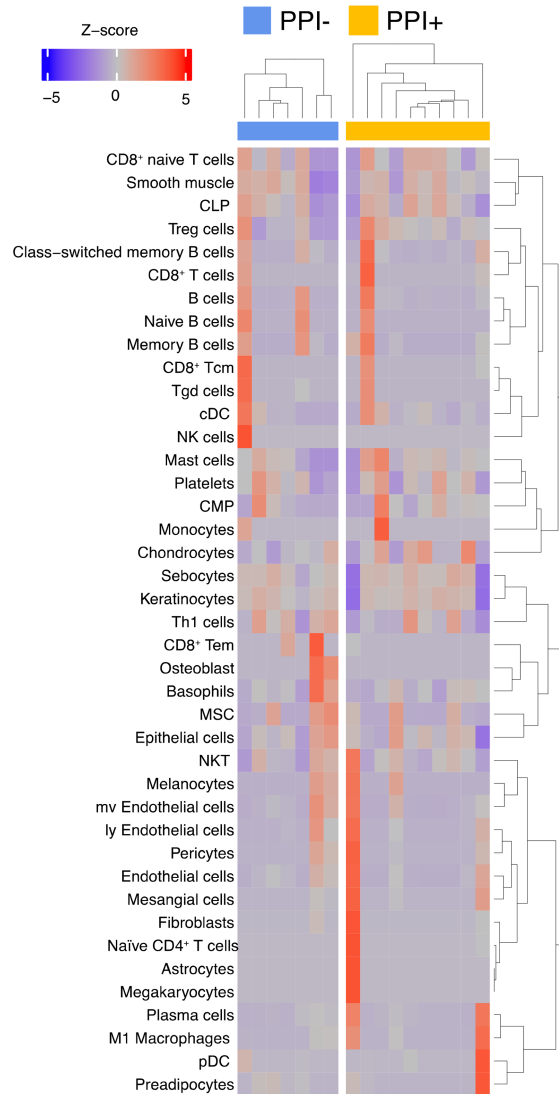

**Supplemental Table S1. Characteristics of Study Cohort**

|                             | Overall<br>(N = 17) | PPI-<br>(n = 7) | PPI+<br>(n = 10) | p Value |
|-----------------------------|---------------------|-----------------|------------------|---------|
| Age at endoscopy, y*        | 14 (12–16)          | 14 (11–15)      | 14 (13–16)       | 0.44    |
| Female†                     | 12 (63)             | 3 (43)          | 7 (70)           | 0.18    |
| White†                      | 17 (89)             | 7 (100)         | 8 (80)           | 0.12    |
| Presenting symptoms‡        |                     |                 |                  |         |
| Abdominal pain              | 13 (68)             | 5 (71)          | 6 (60)           | 0.41    |
| Dysphagia                   | 3 (16)              | 1 (14)          | 2 (20)           | 0.56    |
| Throat clearing             | 1 (5)               | 1 (14)          | 0 (0)            | —       |
| Allergic comorbidities‡     |                     |                 |                  |         |
| Food allergies              | 4 (21)              | 1 (14)          | 3 (30)           | 0.16    |
| Allergic rhinitis           | 2 (11)              | 1 (14)          | 1 (10)           | 0.22    |
| Asthma                      | 2 (11)              | 1 (14)          | 1 (10)           | 0.22    |
| Eczema                      | 3 (16)              | 2 (28)          | 1 (10)           | 0.12    |
| No. of esophageal biopsies* | 3 (2–4)             | 3 (3–4)         | 3 (2–4)          | 0.38    |
| PPIs†                       |                     |                 |                  |         |
| Omeprazole                  |                     |                 | 8 (80)           |         |
| Esomeprazole                |                     |                 | 1 (10)           |         |
| Pantoprazole                |                     |                 | 1 (10)           |         |
| Duration of PPI,‡ days      |                     |                 | 53 (3–224)       |         |
| Dose of PPI,‡ mg/kg/day     |                     |                 | 0.6 (0.4–0.9)    |         |

PPI, proton-pump inhibitor

\* Median (IQR).

† n (%).

‡ Median (min–max): The daily dose was identical for the 3 PPIs studied.

**Supplemental Table S2. Differentially Expressed Genes Between PPI+ and PPI- Groups**

| GeneName        | baseMean   | log2FoldChange | lfcSE      | stat       | p value  | padj       | Gene Description                                                                               |
|-----------------|------------|----------------|------------|------------|----------|------------|------------------------------------------------------------------------------------------------|
| <i>CDH17</i>    | 471.675597 | 5.14964155     | 1.30456263 | 3.94740846 | 7.90E-05 | 0.04528378 | cadherin 17 [Source: HGNC Symbol; Acc: HGNC: 1756]                                             |
| <i>PTPRH</i>    | 243.733171 | 6.41151673     | 1.54924264 | 4.13848454 | 3.50E-05 | 0.02783264 | protein tyrosine phosphatase: receptor type H [Source: HGNC Symbol; Acc: HGNC: 9672]           |
| <i>ABCC6</i>    | 62.6587075 | 5.22006697     | 1.27069403 | 4.10804398 | 3.99E-05 | 0.0286908  | ATP binding cassette subfamily C member 6 [Source: HGNC Symbol; Acc: HGNC: 57]                 |
| <i>MISP</i>     | 627149188  | 7.15878082     | 1.45521272 | 4.91940505 | 8.68E-07 | 0.00255885 | mitotic spindle positioning [Source: HGNC Symbol; Acc: HGNC: 27000]                            |
| <i>HNF4A</i>    | 388.482867 | 6.87052234     | 1.7030997  | 4.03412808 | 5.48E-05 | 0.03414616 | hepatocyte nuclear factor 4 alpha [Source: HGNC Symbol; Acc: HGNC: 5024]                       |
| <i>MSLN</i>     | 420.773977 | 5.79792473     | 1.10455657 | 5.24909714 | 1.53E-07 | 0.0007301  | mesothelin [Source: HGNC Symbol; Acc: HGNC: 7371]                                              |
| <i>KIAA1211</i> | 152.20172  | 4.1351243      | 1.00956561 | 4.09594409 | 4.20E-05 | 0.0286908  | KIAA1211 [Source: HGNC Symbol; Acc: HGNC: 29219]                                               |
| <i>SPDEF</i>    | 33.5608522 | 6.31051008     | 1.45475018 | 4.33786512 | 1.44E-05 | 0.01585928 | SAM pointed domain containing ETS transcription factor [Source: HGNC Symbol; Acc: HGNC: 17257] |
| <i>VIL1</i>     | 464.478199 | 5.96181697     | 1.46519835 | 4.06894873 | 4.72E-05 | 0.03076113 | villin 1 [Source: HGNC Symbol; Acc: HGNC: 12690]                                               |
| <i>ITPKA</i>    | 62.9782627 | 4.96178046     | 1.18291699 | 4.19452972 | 2.73E-05 | 0.02612247 | inositol-trisphosphate 3-kinase A [Source: HGNC Symbol; Acc: HGNC: 6178]                       |
| <i>SLC3A1</i>   | 83.1414388 | 5.5572847      | 1.26695973 | 4.38631519 | 1.15E-05 | 0.01560161 | solute carrier family 3 member 1 [Source: HGNC Symbol; Acc: HGNC: 11025]                       |

(Table cont.)

**Supplemental Table S2. Differentially Expressed Genes Between PPI+ and PPI- Groups (cont.)**

| GeneName | baseMean   | log2FoldChange | lfcSE      | stat       | p value  | padj       | Gene Description                                                                                                   |
|----------|------------|----------------|------------|------------|----------|------------|--------------------------------------------------------------------------------------------------------------------|
| B3GN7    | 298.442808 | 3.00733734     | 0.76988317 | 3.9062256  | 9.37E-05 | 0.04978013 | UDP-GlcNAc:betaGal<br>beta-1:3-N-<br>acetylglucosaminyltransferase<br>7 [Source: HGNC Symbol; Acc:<br>HGNC: 18811] |
| TFF3     | 367.672486 | 7.35214965     | 1.68665347 | 4.35901612 | 1.31E-05 | 0.01560161 | trefoil factor 3 [Source: HGNC<br>Symbol; Acc: HGNC: 11757]                                                        |
| P1GR     | 17617.946  | 7.82585838     | 1.59259667 | 4.91389849 | 8.93E-07 | 0.00255885 | polymeric immunoglobulin<br>receptor [Source: HGNC<br>Symbol; Acc: HGNC: 8968]                                     |
| WDR72    | 46.2885444 | 4.73865588     | 1.06354442 | 4.4555317  | 8.37E-06 | 0.0133246  | WD repeat domain 72 [Source:<br>HGNC Symbol; Acc: HGNC:<br>26790]                                                  |
| MYO1A    | 536.576127 | 6.07547516     | 1.463968   | 4.15000544 | 3.32E-05 | 0.02783264 | myosin IA [Source: HGNC<br>Symbol; Acc: HGNC: 7595]                                                                |
| PCSK9    | 77.8564438 | 1.89623373     | 0.35643506 | 5.3199978  | 1.04E-07 | 0.0007301  | proprotein convertase<br>subtilisin/kexin type 9 [Source:<br>HGNC Symbol; Acc: HGNC:<br>20001]                     |
| MUC3A    | 1110.7388  | 6.66331604     | 1.60746996 | 4.14521963 | 3.39E-05 | 0.02783264 | mucin 3A: cell surface<br>associated [Source: HGNC<br>Symbol; Acc: HGNC: 7513]                                     |
| PDZ3     | 84.0325265 | 5.10490709     | 1.30690294 | 3.90611035 | 9.38E-05 | 0.04978013 | PDZ domain containing 3<br>[Source: HGNC Symbol; Acc:<br>HGNC: 19891]                                              |
| B3GALT5  | 1201.57497 | 3.54819829     | 0.81222923 | 4.3684691  | 1.25E-05 | 0.01560161 | beta-1:3-galactosyltransferase<br>5 [Source: HGNC Symbol; Acc:<br>HGNC: 920]                                       |
| DMBT1    | 3594.09568 | 8.08693621     | 1.67114077 | 4.83917115 | 1.30E-06 | 0.00311395 | deleted in malignant brain<br>tumors 1 [Source: HGNC<br>Symbol; Acc: HGNC: 2926]                                   |
| BCL2L15  | 185.553771 | 3.35320926     | 0.81720559 | 4.10326277 | 4.07E-05 | 0.0286908  | BCL2 like 15 [Source: HGNC<br>Symbol; Acc: HGNC: 33624]                                                            |

**Supplemental Table S2. Differentially Expressed Genes Between PPI+ and PPI- Groups (cont.)**

| GeneName | baseMean   | log2FoldChange | lfcSE      | stat        | p value  | padj       | Gene Description                                                                          |
|----------|------------|----------------|------------|-------------|----------|------------|-------------------------------------------------------------------------------------------|
| EPS8L3   | 198.097436 | 7.95162414     | 1.78150733 | 4.46342489  | 8.07E-06 | 0.0133246  | EPS8 like 3 [Source: HGNC Symbol; Acc: HGNC: 21297]                                       |
| MUC2     | 1084.23105 | 8.32854316     | 1.86137421 | 4.474440558 | 7.66E-06 | 0.0133246  | mucin 2; oligomeric mucus/gel-forming [Source: HGNC Symbol; Acc: HGNC: 7512]              |
| IGHA2    | 8487.06855 | 6.28525816     | 1.47713338 | 4.25503767  | 2.09E-05 | 0.02139406 | immunoglobulin heavy constant alpha 2 (A2m marker) [Source: HGNC Symbol; Acc: HGNC: 5479] |
| PHGR1    | 314.740863 | 12.8381323     | 2.13739359 | 6.00644278  | 1.90E-09 | 2.72E-05   | proline: histidine and glycine rich 1 [Source: HGNC Symbol; Acc: HGNC: 37226]             |
| UGT1A10  | 101.433818 | 2.9284853      | 0.73582636 | 3.97985921  | 6.90E-05 | 0.04117253 | UDP glucuronosyltransferase family 1 member A10 [Source: HGNC Symbol; Acc: HGNC: 12531]   |

lfcSE, log-fold change standard error; padj, adjusted p value; PPI, proton pump inhibitor; stat, statistical value or test statistic
